# Supplementary material
Source: PubMed Central journal article supplement (PMC5674777)
Supplement: NIHMS866261-supplement-1.pdf [file NIHMS866261-supplement-1.pdf]

**Supplemental Fig 1 (related to Figure 1). NLRP14 expression is down-regulated following fertilization, is expressed in certain human cell lines, and is functionally conserved in mouse**

(a) Expression of NLRP14 mRNA in early preimplantation embryos. Shown is RNA-seq data from Yan et al (2013) (b) NLRP14 expression across 293T, iHBEC, A549, and Caco2 cells (shown are qPCR data relative to GAPDH). (c) Primary human bronchial epithelial cells (HBEC) were challenged with either viral RNA (vRNA) or influenza virus and monitored for IFN $\beta$  production (ELISA) or viral replication (NP ELISA) in the presence or absence of NLRP14 knock-down by siRNA. (d) Knock-down validation of NLRP14 mRNA expression (shown are qPCR data relative to GAPDH). (e) Inhibition of TBK1 mediated activation of IFN $\beta$ -, ISRE-, and NF $\kappa$ B-luc reporters by human NLRP14 and mouse nlrp14 in 293T cells. (f) 293T cells were transfected with mouse sting and nlrp14 and monitored for ISRE- and NF $\kappa$ B-luc activity. (g) 293T cells transfected with mouse sting-HA and Myc-nlrp14 were monitored for phospho-TBK1 and phospho-IRF3 by western blot analysis. Data are representative of at least two independent experiments.

**Supplemental Fig 2 (related to Figure 3 and Figure 6). Establishment of NLRP14-CRISPR cells in 293T and STING-293T cells.** Target sequences and PCR detection of mutated NLRP14 are shown for 293T-NLRP14-CRISPR (a) and 293T-NLRP14-CRISPR cells is shown (genomic DNA was extracted and detection mutations was monitored by PCR and sequencing). (c) Rhodamine-labeled B-DNA (B-DNA Rho) was transfected into parental (WT) and 293-NLRP14-CRISPR (KO) cells and observed by fluorescence microscopy. Data are representative of at least two independent experiments.

**Supplemental Fig 3 (related to Figure 4 and 5). NLRP14 regulates signaling following viral infection and interacts with TBK1 .** 293T cells were transfected with TBK1-FL (a) or IRF7-FL in combination with Myc-NLRP14 (where indicated) and challenged with NDV-GFP followed by whole cell lysis and monitoring of key signaling events (as indicated) by western blotting. (c) Nuclear translocation of IRF3 was monitored (by western blotting) in 293T and NLRP14-CRISPR cells in response to

NDV-GFP infection. (d) 293T cells were transfected with-Myc NLRP14 and then whole cell lysates were fractionated to determine co-association of NLRP14 with endogenous cellular factors including TBK1. Data are representative of at least two independent experiments.

**Supplemental Figure 4. Validation of NLRP14 as the target in NLRP14-CRISPR cells (related to Figure 3).** (a) 293T cells were transfected with NLRP14 or NACHT domain of NLRP14 (as indicated) and monitored for the ability to modulate TBK1 mediated activation of IFN $\beta$ -, NF $\kappa$ B-, or ISRE-luc activity. Complementation assay to demonstrate the NLRP14 intrinsic affect in NLRP14-CRISPR cells was performed by generating expression plasmids coding for an NLRP14 mutant (NLRP14 Mut) where the gRNA target sequence was mutated such that it could not be targeted for editing (a). Cells were then transfected with indicated constructs and monitored for TBK1 mediated activation of IFN $\beta$ -luc (b), phosphorylation of TBK1 and IRF3 (d), or ubiquitination of TBK1 by immunoblotting (e). Data are representative of at least two independent experiments.

**Supplemental Figure 5 (related to Figure 2, Figure 6, and Figure 7). NLRP14 function is independent of NLRP4.** Genomic DNA (gDNA) was extracted from NLRP4-CRISPR cells sequenced to determine CRISPR editing (a). 293T and 293T-NLRP4-CRISPR cells were stimulated with indicated ligands (25  $\mu$ g/ml of PolyI:C and NDV-GFP at the m.o.i of 10) and monitored for ISRE-luc activity. 293T-NLRP4-CRISPR cells were cotransfected with TBK1 and NLRP14 and monitored for phosphorylation (c) and ubiquitination (d) of TBK1 by immunoblotting. (e) 293T-NLRP4-CRISPR cells were co-transfected with indicated expression constructs and monitored for activation of IFN $\beta$ -luc activation. Data are representative of at least two independent experiments.

**Supplemental Figure 6 (related to Figure 5 and Figure 6). NLRP14 LRR negatively regulates NLRP14 dependent induction of TBK1 ubiquitination independently of Lysine 670 on TBK1.** (a) 293T cells were cotransfected with MAVS-Flag or STING-HA and NLRP14 or mutants lacking PYD ( $\Delta$ -PYD), NACHT ( $\Delta$ -NACHT), or LRR ( $\Delta$ -LRR) domains. Whole-cell lysates were subjected to immunoblotting using the appropriate antibodies. (b) 293T cells were cotransfected with TBK1 or STING and NLRP14 or  $\Delta$ -LRR mutant and monitored for IFN $\beta$ -luc activation. (d-e) 293T cells were co-transfected with TBK1 or TBK1 containing a K-R mutation at position 670 (a; K670R) and NLRP14 and monitored for reported activation (d) and TBK1 ubiquitination (e) by immunoblotting. (c) Schematic of TBK1 mutant; KD, kinase domain ; ULD, ubiquitin-like domain ; CC, coiled-coil domain. 293T cells were co-transfected with IPS-1-FL and Myc-NLRP14 and treated with DMSO, MG132 (20  $\mu$ M), or Bafilomycin A1 (100 nM) to monitor affects on NLRP14 degradation. (f) Whole-cell lysates were prepared at indicated time points and subjected to immunoblotting using indicated antibodies. Data are representative of at least two independent experiments.

**Supporting Figure 7 (related to Figure 7). Naturally occurring mutation in NLRP14 results in loss of function and recovery of NAS sensing.** 293T cells were co-transfected with TBK1-FL and NLRP14-FL or NLRP14 containing one of the SNPs identified (D86V, A375T, D522Q, and M1019I) and monitored for IFN $\beta$ - and NF $\kappa$ B-luc activation or subjected to immunoblotting with indicated antibodies. (b) 293T cells were co-transfected with TBK1 and NLRP14 or K108X and mRNA expression of IFN $\beta$  and IP10 were determined by real-time PCR. Shown are  $\Delta$ CT values relative to GAPDH. (c) Schematic of NLRP14 and C-terminal Flag-tagged truncation mutant of NLRP14 (1-108-FL). 293T cells were cotransfected with TBK1 and NLRP14-FL or 1-108-FL (d-f) and monitored for either IFN $\beta$ -luc and NF $\kappa$ B-luc promoter or IFN $\beta$  and IP10 mRNA expression by real time PCR (e-f). Expression of NLRP14-FL and 1-108-FL was confirmed by immunoblotting (d). Real-time PCR data was normalized to the expression of GAPDH mRNA. Data are representative of at least two independent experiments.

**a.**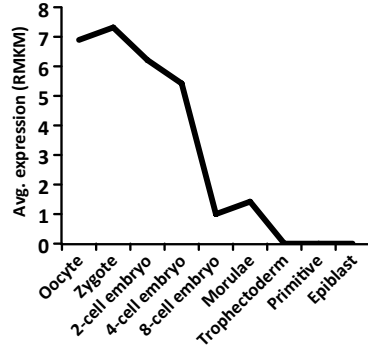**b.**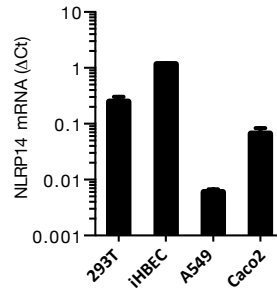**e.**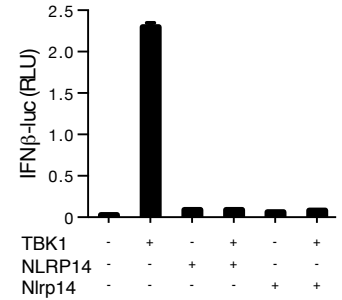**c.**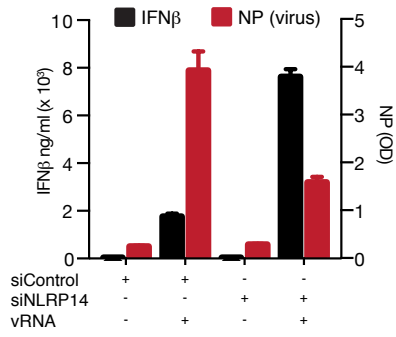**d.**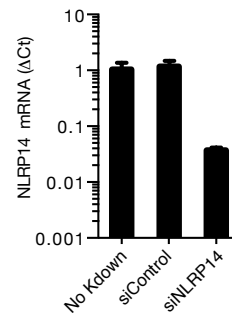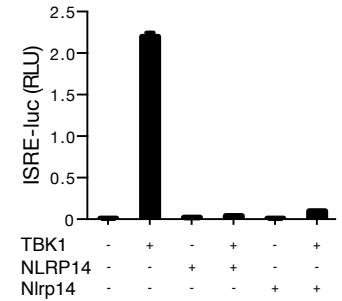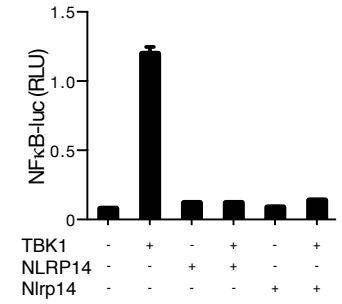**f.**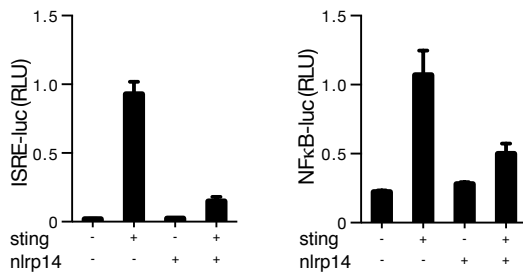**g.**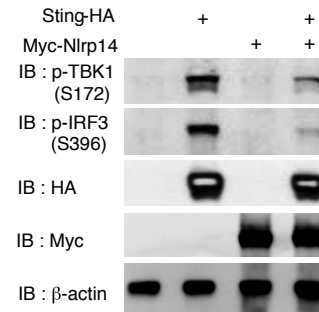

**a.**

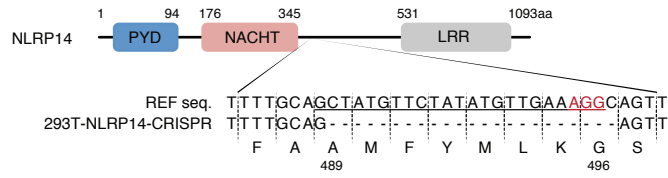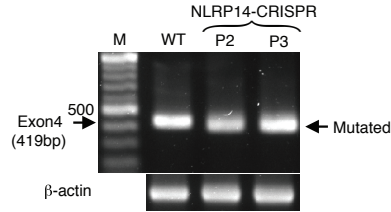

**b.**

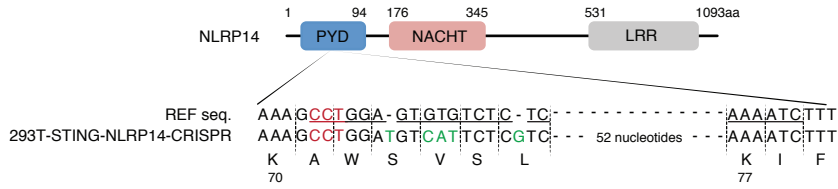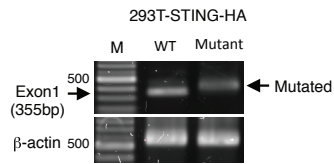

**c.**

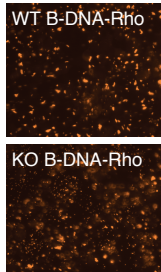



**a.**

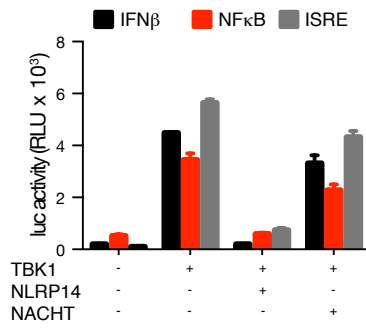

**b.**

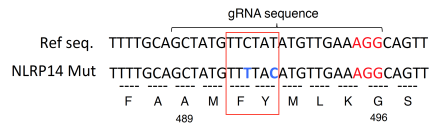

**c.**

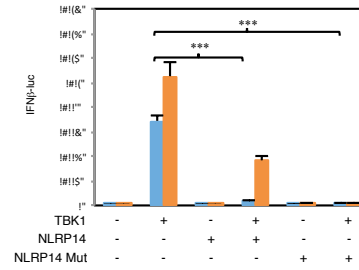

**d.**

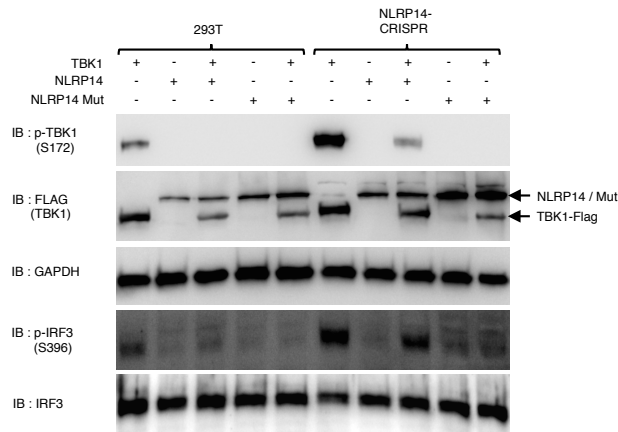

**e.**

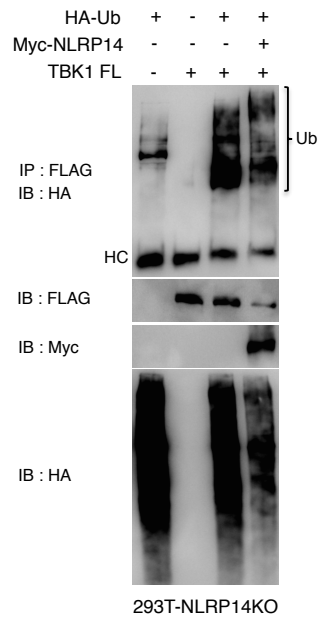

**a.**

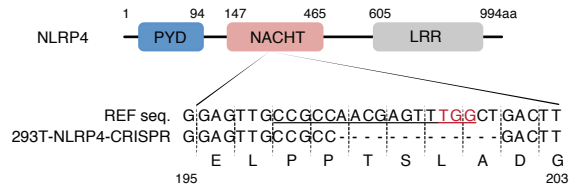

**b.**

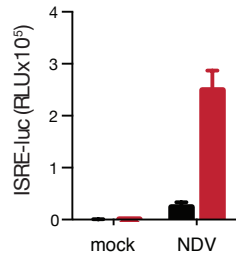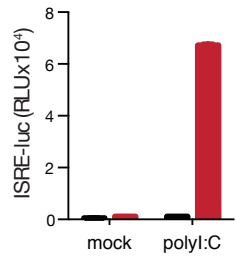

**d.**

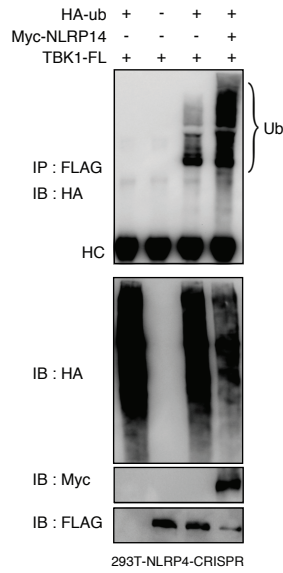

**c.**

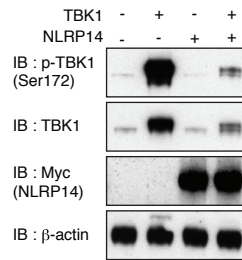

**e.**

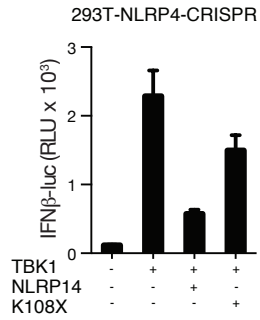



a.

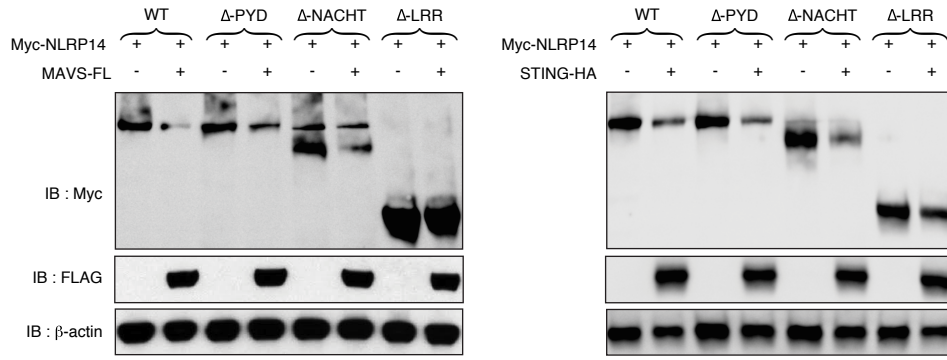

b.

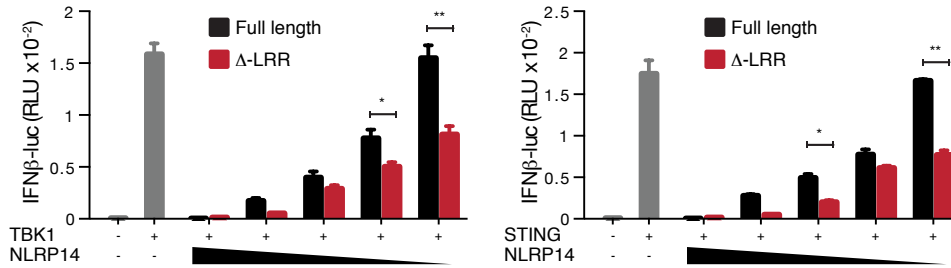

c.

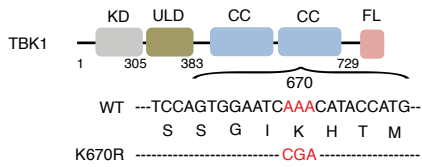

d.

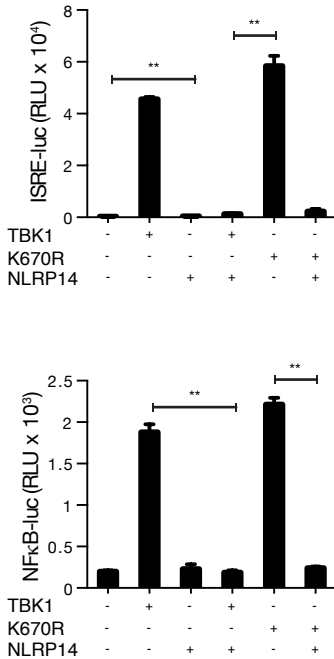

e.

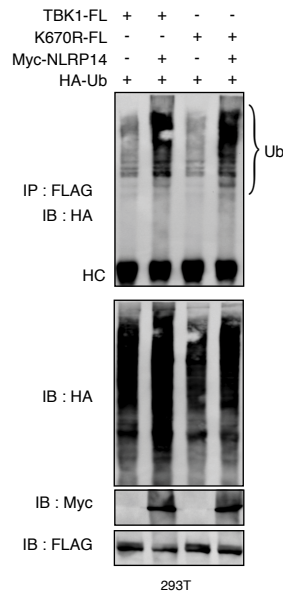

f.

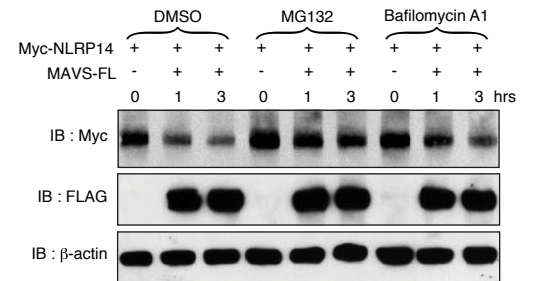

a.

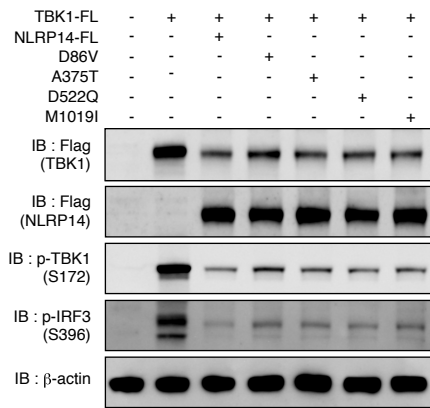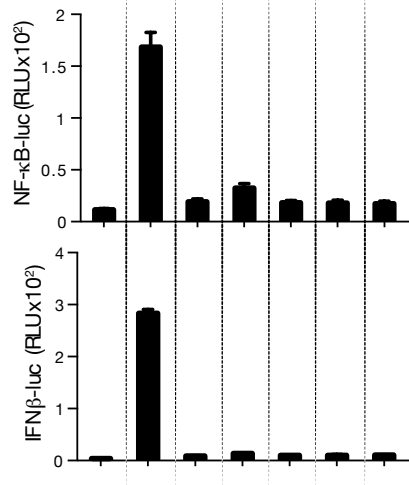

b.

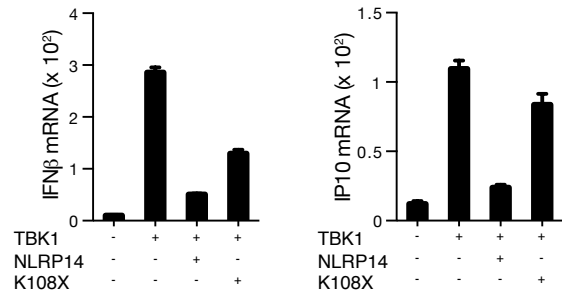

c.

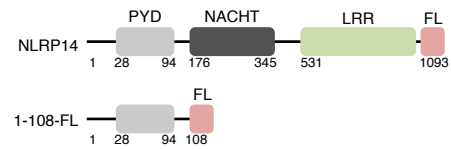

d.

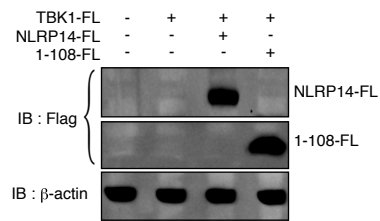

e.

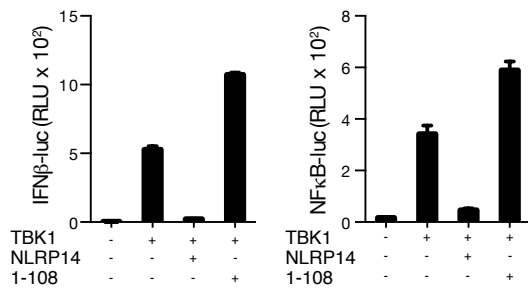

f.

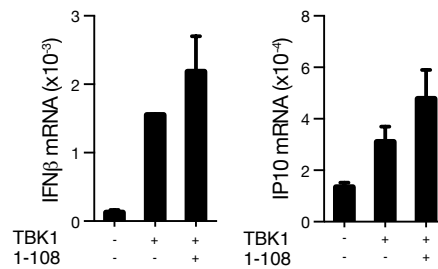

| Gene    | RefSeq                                           | EtrrezID | SPR FPKM | Oo FPKM  | 1C FPKM   |
|---------|--------------------------------------------------|----------|----------|----------|-----------|
| Ddx58   | NM_172689                                        | 230073   | 3.49265  | 6.21611  | 13.7693   |
| Tbk1    | NM_019786                                        | 56480    | 15.068   | 5.75776  | 9.21457   |
| Irf3    | NM_016849,NR_045611                              | 54131    | 10.3631  | 5.26195  | 1.5826    |
| Mavs    | NM_001206382,NM_001206383,NM_001206385,NM_144888 | 228607   | 10.0954  | 15.7585  | 16.8123   |
| Traf3   | NM_001286122,NM_011632                           | 22031    | 3.79894  | 5.2888   | 10.7513   |
| Traf6   | NM_009424                                        | 22034    | 8.76028  | 0.897822 | 2.53922   |
| Ifnar1  | NM_010508                                        | 15975    | 9.8854   | 7.35525  | 7.25313   |
| Mb21d1  | NM_173386                                        | 214763   | 0.577828 | 23.1384  | 16.6859   |
| Ddx41   | NM_134059                                        | 72935    | 16.6363  | 17.5956  | 9.71526   |
| Trex1   | NM_001012236,NM_011637                           | 22040    | 23.0882  | 1.3553   | 1.96993   |
| Tmem173 | NM_001289591,NM_001289592,NM_028261              | 72512    | 2.8505   | 0        | 0.0139251 |
| Tlr3    | NM_126166                                        | 142980   | 2.41825  | 2.14173  | 1.97696   |

Source: DBTMEE (Database of Transcriptome in Mouse Early Embryos)

#### References

1. Park SJ, Komata M, Inoue F, Yamada K, Nakai K, Ohsugi M, Shirahige K, "Inferring the choreography of parental genomes during fertilization from ultralarge-scale whole-transcriptome analysis", *Genes Dev.* 2013 Dec 15;27(24):2736-48
2. Brooke LaFlamme, "Gene expression in early development", *Nat Genet* 46, 99 (2014)

| Tissue          | alias | number of samples |
|-----------------|-------|-------------------|
| Esophagus       | ES    | 227               |
| Blood Vessel    | BV    | 221               |
| Brain           | BRN   | 151               |
| Skin            | SK    | 146               |
| Adipose Tissue  | AT    | 135               |
| Heart           | HR    | 123               |
| Muscle          | MS    | 121               |
| Lung            | LN    | 120               |
| Thyroid         | TH    | 107               |
| Nerve           | NR    | 85                |
| Stomach         | ST    | 81                |
| Colon           | CL    | 74                |
| Breast          | BRS   | 65                |
| Pancreas        | PN    | 65                |
| Testis          | TS    | 60                |
| Adrenal Gland   | AG    | 52                |
| Prostate        | PR    | 42                |
| Uterus          | UT    | 36                |
| Ovary           | OV    | 35                |
| Liver           | LV    | 34                |
| Spleen          | SP    | 34                |
| Vagina          | VG    | 34                |
| Pituitary       | PT    | 22                |
| Small Intestine | SI    | 17                |
| Bladder         | BL    | 11                |
| Cervix Uteri    | CU    | 9                 |
| Kidney          | KD    | 8                 |
| Fallopian Tube  | FT    | 6                 |
| Salivary Gland  | SG    | 5                 |
